# Supplementary material for: Evaluation of Right Ventricular Function and Myocardial Microstructure in Fetal Hypoplastic Left Heart Syndrome
Source: MDPI journal article supplement (doi:10.3390/jcm11154456), 2022-07-30
Supplement: s1 [file s1]

**supplemental material**

**Table S1.** Correlation between HA degrees and RVGLS (%) in HLHS fetuses.

| Variable     | R <sup>2</sup> | P value |
|--------------|----------------|---------|
| Basal        |                |         |
| lateral      | 0.97           | 0.02    |
| anteroseptal | 0.83           | 0.09    |
| inferoseptal |                |         |
| Middle       |                |         |
| lateral      | 0.71           | 0.16    |
| anteroseptal | 0.67           | 0.39    |
| inferoseptal |                |         |
| Apical       |                |         |
| lateral      | 0.12           | 0.65    |
| anteroseptal |                |         |
| inferoseptal |                |         |

HA, helix angle, 95%CI, 95% confidence interval.

**Table S2.** Correlation between FA, MD and RVGLS in HLHS fetuses.

| Variable | R <sup>2</sup> | P value |
|----------|----------------|---------|
| FA       | 0.0028         | 0.95    |
| MD       | 0.93           | 0.04    |

FA, fractional anisotropy, MD, mean diffusivity.

**Table S3.** Inter-Observer and Intra-Observer Reproducibility for the Parameters of Myocardial deformation.

|                                   | ICC (95% CI)    | Bias  | 95% LOA    |
|-----------------------------------|-----------------|-------|------------|
| Inter-observer (n=30)             |                 |       |            |
| RVGLS (%)                         | 0.85(0.81-0.93) | 0.26  | -3.69-4.52 |
| RVGLVs (cm/s)                     | 0.86(0.83-0.92) | 0.09  | -0.36-0.40 |
| RVGLSRs( <i>s</i> <sup>-1</sup> ) | 0.82(0.79-0.88) | -0.12 | -0.52-0.36 |
| RVGLDd (mm)                       | 0.88(0.81-0.90) | -0.09 | -0.82-0.79 |
| RVGLVd (cm/s)                     | 0.86(0.79-0.92) | 0.13  | -1.06-1.10 |
| RVGLSRd( <i>s</i> <sup>-1</sup> ) | 0.84(0.76-0.89) | 0.16  | -1.23-1.68 |
| Intra-observer (n=30)             |                 |       |            |
| RVGLS (%)                         | 0.90(0.82-0.96) | 0.04  | -2.99-2.44 |
| RVGLVs (cm/s)                     | 0.85(0.78-0.89) | 0.02  | -0.31-0.35 |
| RVGLSRs( <i>s</i> <sup>-1</sup> ) | 0.88(0.80-0.92) | -0.01 | -0.39-0.31 |
| RVGLDd (mm)                       | 0.91(0.83-0.96) | -0.02 | -0.45-0.43 |
| RVGLVd (cm/s)                     | 0.89(0.81-0.91) | 0.10  | -1.25-1.45 |
| RVGLSRd( <i>s</i> <sup>-1</sup> ) | 0.91(0.84-0.95) | 0.05  | -0.59-0.69 |

RVGLS, right ventricle global longitudinal strain. RVGLV, right ventricle global longitudinal velocity, RVGLD, right ventricle global longitudinal displacement, RVGLSR, right ventricle global longitudinal strain rate. 95% LOA, 95% limits of agreement.
